# Supplementary material for: Rotundifuran Induces Ferroptotic Cell Death and Mitochondria Permeability Transition in Lung Cancer Cells
Source: MDPI journal article supplement (doi:10.3390/biomedicines12030576), 2024-03-05
Supplement: s1 [file s1]

Supplementary Information

Rotundifuran Induces Ferroptotic Cell Death and Mitochondria Permeability Transition in Lung  
Cancer Cells  
Myung-Ji Kang *et al.*

---

● Supplementary Figures

**Figure S1.** Original western blots in Figure 3 ..... 2

**Figure S2.** Original western blots in Figure 4 ..... 3

**Figure S3.** Original western blots in Figure 6 .....4

**Figure S4.** The changes in ER stress-related genes induced by RF treatment based on the microarray results.....5

● Supplementary Table

**Table S1.** The list of ER stress-related genes changed by RF treatment in A549 cells..... 6

**(A)**

| Target   | Size       | Original image                                                                    |
|----------|------------|-----------------------------------------------------------------------------------|
| LC3      | 14, 16 kDa | 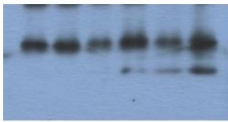 |
| Beclin1c | 52 kDa     |  |
| ATG5     | 32 kDa     |  |
| p62      | 62 kDa     |  |
| Tubulin  | 50 kDa     |  |

**(B)**

| Target | Size       | Original image                                                                      |
|--------|------------|-------------------------------------------------------------------------------------|
| LC3    | 14, 16 kDa | 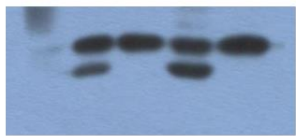 |

**Figure S1.** Original western blots in Figure 7. **(A)** Uncropped and unprocessed images of Figure 3D. **(B)** Original images of Figure 3E.

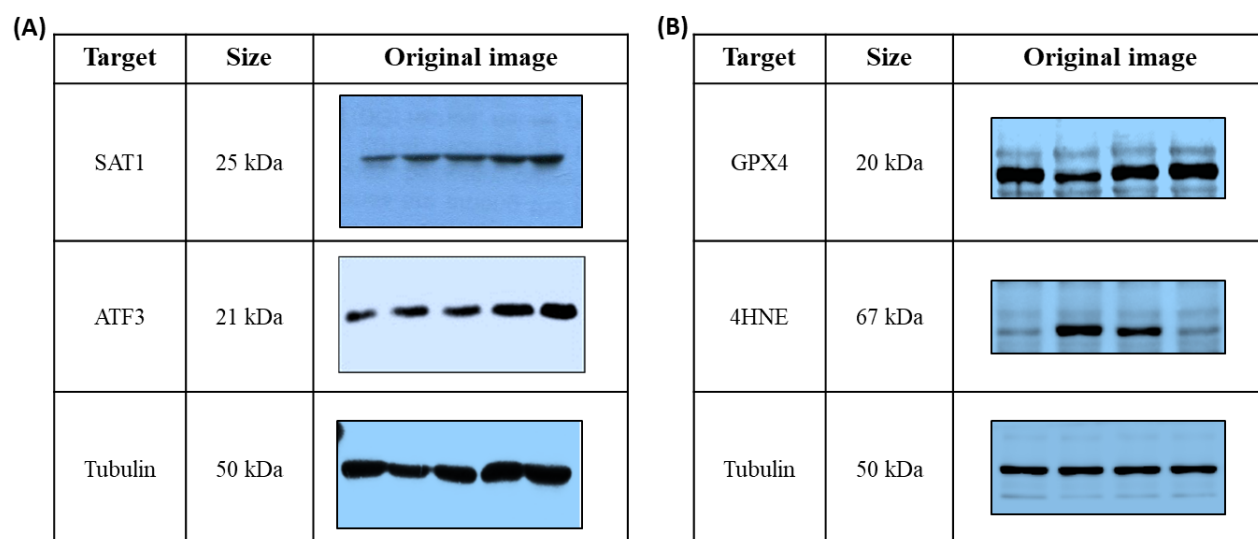

**Figure S2.** Original western blots in Figure 4. **(A)** Uncropped and unprocessed images of Figure 4C. **(B)** Original images of Figure 4E.

**(A)**

| Target  | Size       | Original image                                                                    |
|---------|------------|-----------------------------------------------------------------------------------|
| p-JNK   | 46, 54 kDa |  |
| JNK     | 46, 54 kDa |  |
| Tubulin | 50 kDa     |  |

**(B)**

| Target  | Size   | Original image                                                                      |
|---------|--------|-------------------------------------------------------------------------------------|
| ATF3    | 21 kDa | 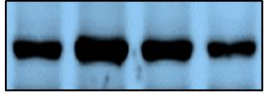 |
| Tubulin | 50 kDa |  |

**Figure S3.** Original western blots in Figure 6. **(A)** Uncropped and unprocessed images of Figure 6G. **(B)** Original images of Figure 6H.

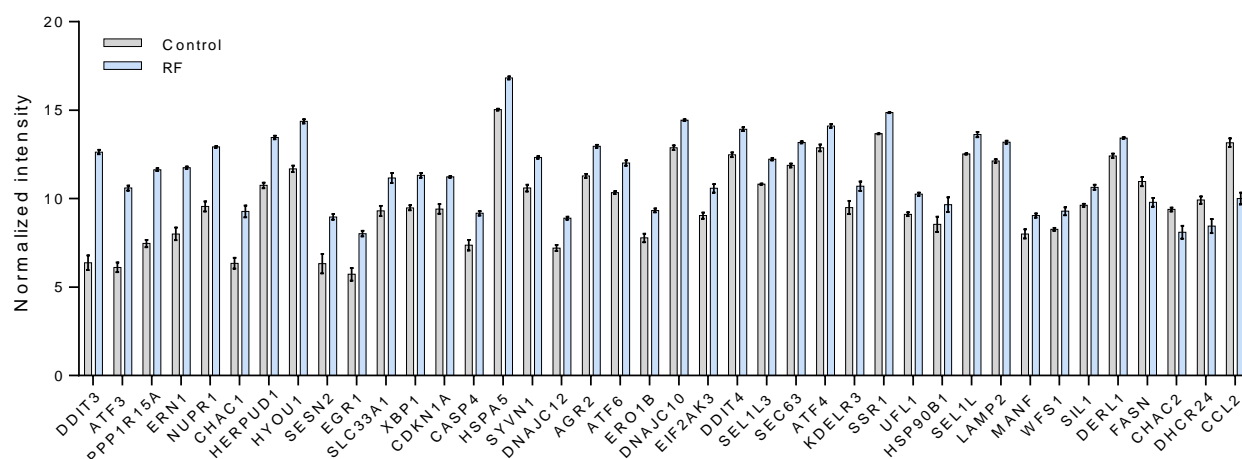

**Figure S4.** The changes in ER stress-related genes induced by RF treatment based on the microarray results. Microarray data were obtained from three independent experiments in A549 cells treated with RF. The data were represented as a bar graph, illustrating the normalized intensity.

**Table S1.** The list of ER stress-related genes changed by RF treatment in A549 cells

| Gene     | Full name                                                                                      | Log2 fold change | Gene    | Full name                                                 | Log2 fold change |
|----------|------------------------------------------------------------------------------------------------|------------------|---------|-----------------------------------------------------------|------------------|
| DDIT3    | DNA-damage-inducible transcript 3                                                              | 76.6             | DNAJC10 | DnaJ (Hsp40) homolog, subfamily C, member 10              | 2.9              |
| ATF3     | activating transcription factor 3                                                              | 22.4             | EIF2AK3 | eukaryotic translation initiation factor 2-alpha kinase 3 | 2.9              |
| PPP1R15A | protein phosphatase 1, regulatory subunit 15A                                                  | 18.0             | DDIT4   | DNA damage inducible transcript 4                         | 2.7              |
| ERN1     | endoplasmic reticulum to nucleus signaling 1                                                   | 13.3             | SEL1L3  | sel-1 suppressor of lin-12-like 3 (C. elegans)            | 2.7              |
| NUPR1    | nuclear protein 1, transcriptional regulator                                                   | 10.4             | SEC63   | SEC63 homolog, protein translocation regulator            | 2.5              |
| CHAC1    | ChaC glutathione-specific gamma-glutamylcyclotransferase 1                                     | 7.6              | ATF4    | activating transcription factor 4                         | 2.4              |
| HERPUD1  | homocysteine-inducible, endoplasmic reticulum stress-inducible, ubiquitin-like domain member 1 | 6.5              | KDEL    | (Lys-Asp-Glu-Leu)                                         | 2.3              |
| HYOU1    | hypoxia up-regulated 1                                                                         | 6.5              | KDELRL3 | endoplasmic reticulum protein retention receptor 3        | 2.3              |
| SESN2    | sestrin 2                                                                                      | 6.2              | SSR1    | signal sequence receptor, alpha                           | 2.3              |
| EGR1     | early growth response 1                                                                        | 4.9              | UFL1    | UFM1-specific ligase 1                                    | 2.2              |
| SLC33A1  | solute carrier family 33 (acetyl-CoA transporter), member 1                                    | 3.6              | HSP90B1 | Transcript Identified by AceView, Entrez Gene ID(s) 7184  | 2.2              |
| XBP1     | X-box binding protein 1                                                                        | 3.6              | SEL1L   | sel-1 suppressor of lin-12-like (C. elegans)              | 2.1              |
| CDKN1A   | cyclin-dependent kinase inhibitor 1A (p21, Cip1)                                               | 3.5              | LAMP2   | lysosomal-associated membrane protein 2                   | 2.1              |
| CASP4    | caspase 4                                                                                      | 3.5              | MANF    | mesencephalic astrocyte-derived neurotrophic factor       | 2.1              |
| HSPA5    | heat shock 70kDa protein 5 (glucose-regulated protein, 78kDa)                                  | 3.4              | WFS1    | Wolfram syndrome 1 (wolframin)                            | 2.0              |
| SYVN1    | synovial apoptosis inhibitor 1, synoviolin                                                     | 3.3              | SIL1    | SIL1 nucleotide exchange factor                           | 2.0              |
| DNAJC12  | DnaJ (Hsp40) homolog, subfamily C, member 12                                                   | 3.2              | DERL1   | derlin 1                                                  | 2.0              |
| AGR2     | anterior gradient 2, protein disulphide isomerase family member                                | 3.2              | FASN    | fatty acid synthase                                       | -2.3             |
| ATF6     | activating transcription factor 6                                                              | 3.2              | CHAC2   | ChaC, cation transport regulator homolog 2 (E. coli)      | -2.4             |
| ERO1B    | endoplasmic reticulum oxidoreductase beta                                                      | 2.9              | DHCR24  | 24-dehydrocholesterol reductase                           | -2.8             |
|          |                                                                                                |                  | CCL2    | chemokine (C-C motif) ligand 2                            | -8.9             |
